# Supplementary material for: Genome-Wide Identification of Vascular Plant One-Zinc-Finger Gene Family in Six Cucurbitaceae Species and the Role of CmoVOZ2 in Salt and Drought Stress Tolerance
Source: MDPI journal article supplement (doi:10.3390/genes15030307), 2024-02-27
Supplement: s1 [file s1]

## Supplementary Materials

### Genome-Wide Identification of *VOZ* Gene Family in Six Cucurbitaceae Species and the Role of *CmoVOZ2* in Salt and Drought Stress Tolerance

Minyan Xu <sup>†</sup>, Zhi Zhang <sup>†</sup>, Yuhuan Jiao, Yaling Tu and Xin Zhang <sup>\*</sup>

National Engineering Laboratory of Crop Stress Resistance Breeding, School of Life Sciences,  
Anhui Agricultural University, Hefei 230036, China

<sup>\*</sup> Correspondence: xinzhang@ahau.edu.cn

<sup>†</sup> These authors contributed equally to this work.

**Table S1.** Chromosomal information of VOZ genes in six Cucurbitaceae species

| Name            | Gene ID           | Chromosome | Location                 |
|-----------------|-------------------|------------|--------------------------|
| <i>CargVOZ1</i> | Carg07755         | Chr07      | 56865 .. 60425 (-)       |
| <i>CargVOZ2</i> | Carg15320         | Chr03      | 338531 .. 342459 (+)     |
| <i>CargVOZ3</i> | Carg03109         | Chr20      | 134324 .. 137402 (+)     |
| <i>CargVOZ4</i> | Carg05122         | Chr07      | 12737 .. 15175 (-)       |
| <i>ClaVOZ1</i>  | Cla97C01G023230.1 | Chr01      | 34763205 .. 34765707 (+) |
| <i>ClaVOZ2</i>  | Cla97C02G036280.1 | Chr02      | 16754161 .. 16756569 (-) |
| <i>CmVOZ1</i>   | MELO3C007248.1    | Chr08      | 1709815 .. 1713888 (-)   |
| <i>CmVOZ2</i>   | MELO3C019321.1    | Chr11      | 11404847 .. 11407858 (-) |
| <i>CmoVOZ1</i>  | CmoCh07G002120.1  | Chr07      | 1063694 .. 1067347 (-)   |
| <i>CmoVOZ2</i>  | CmoCh03G012970.1  | Chr03      | 9786940 .. 9791897 (+)   |
| <i>CmoVOZ3</i>  | CmoCh20G006520.1  | Chr20      | 3187678 .. 3190850 (-)   |
| <i>CmoVOZ4</i>  | CmoCh02G001990.1  | Chr02      | 932111 .. 934978 (-)     |
| <i>CsVOZ1</i>   | CsaV3_6G050500.1  | Chr06      | 29459015 .. 29470420 (+) |
| <i>CsVOZ2</i>   | CsaV3_2G034550.1  | Chr02      | 22956134 .. 22960364 (+) |
| <i>CsVOZ3</i>   | CsaV3_4G028820.1  | Chr04      | 18302368 .. 18304592 (-) |
| <i>LsiVOZ1</i>  | Lsi01G002760.1    | Chr01      | 2456480 .. 2460158 (-)   |
| <i>LsiVOZ2</i>  | Lsi10G000870.1    | Chr10      | 1457206 .. 1460401 (+)   |

**Table S2.** All primers used for gene cloned, qRT-PCR, and vector construction

| Primer name            | Forward Primer Sequence (5'–3')             | Reverse Primer Sequence (5'–3')                       |
|------------------------|---------------------------------------------|-------------------------------------------------------|
| CmoVOZ1 (gene cloning) | TCTATTTCTCGTCCTAC                           | AACCAGCTTTACCGTTATC                                   |
| CmoVOZ2 (gene cloning) | TCCCCGGGTCTAGAAGA                           | AGAAAAAAGAGTTATTATGT                                  |
| CmoVOZ3 (gene cloning) | TTTACCCTGATTTTCGACCC                        | GGTCGGTTGATCAGTTAGTG                                  |
| CmoVOZ4 (gene cloning) | TCATTACGCTCATTCTAAA                         | GACGAGTATGTACCATCATAACAAT                             |
| Cmo-β-Actin (qRT-PCR)  | GTGCCTGCTATGTATGTTGCC                       | GGTCCAAACGGAGAATGGCATG                                |
| CmoVOZ1 (qRT-PCR)      | TTAGTACGAAGGCACAAGGA                        | CACTATAATCCGGCAATGAC                                  |
| CmoVOZ2 (qRT-PCR)      | GAGTCATGCCACCCAATGGA                        | CGATTGAAACCATCAGCCTGC                                 |
| CmoVOZ3 (qRT-PCR)      | CATGGCTACTCAGCCTAATTGTCAA                   | AATGCATGGCAATCCAAAGT                                  |
| CmoVOZ4 (qRT-PCR)      | TTATGCAGAACTTAGTGCTC                        | TGTCCTGACTAAAGTCTCCC                                  |
| CmoVOZ2 (1305-GFP)     | ggacagcccagatcaactagtATGGGAAAACATTCGAAGACCA | ggtcctcgagagctctctagaTGTAAGGTAATATTCGCTCAAATTCTC      |
| CmoVOZ2 (pYES2)        | cgataaggtacctaaggatccATGGGAAAACATTCGAAGACCA | tgctggatatctgcagaattcTGTAAGGTAATATTCGCTCAAATTCT       |
| CmoVOZ1 (pGBKT7)       | atggccatggaggccgaattcATGGGGAAGCATTCTGAAGACC | ctagttatgcggccgctgcagCTACGTAAGGTAATATTCGCTCAAATT      |
| CmoVOZ2 (pGBKT7)       | atggccatggaggccgaattcATGGGAAAACATTCGAAGACCA | ctagttatgcggccgctgcagTGTAAGGTAATATTCGCTCAAATTCT       |
| CmoVOZ3 (pGBKT7)       | atggccatggaggccgaattcATGCCGAAGGGTTTGAAGAGT  | ctagttatgcggccgctgcagTCAGTTAGTGTTAGACATATTCTGATTATGTG |
| CmoVOZ4 (pGBKT7)       | atggccatggaggccgaattcATGCCGAGGGTTTGAAGA     | ctagttatgcggccgctgcagTTATTTGACTGATTGTCCAAGCTCC        |

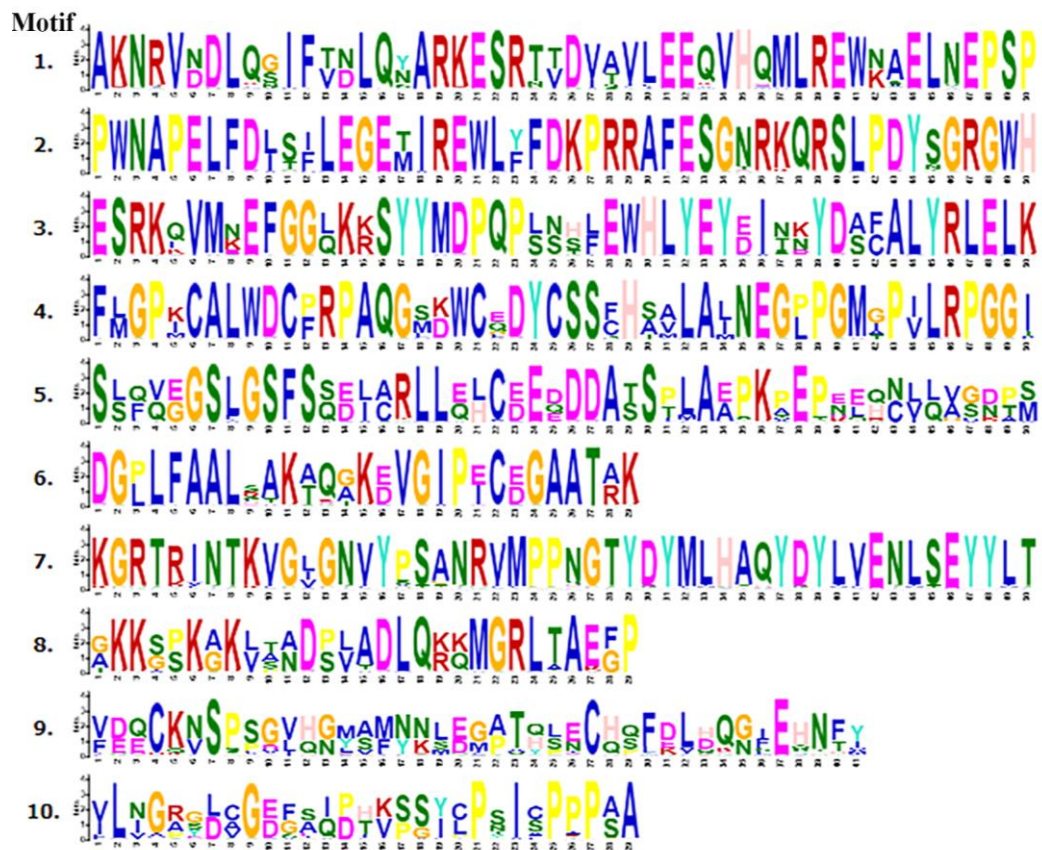

Figure S1. The consensus sequences of ten motifs.
